# Supplementary material for: MolData, a molecular benchmark for disease and target based machine learning
Source: J Cheminform. 2022 Mar 7;14:10. doi: 10.1186/s13321-022-00590-y (PMC8899453; doi:10.1186/s13321-022-00590-y)
Supplement: Supplementary file 7 — Additional file 7. Tagging Keywords. All keywords used for tagging a dataset with a disease benchmark label (i.e., cancer, nervous system, etc.). [file 13321_2022_590_MOESM7_ESM.csv]

name	class
cancer	cancer
tumor	cancer
tumors	cancer
cancers	cancer
anticancer	cancer
leukemia	cancer
tumorigenesis	cancer
breast cancer	cancer
dna damage	cancer
dna repair	cancer
prostate cancer	cancer
oncogenic	cancer
chemotherapeutic	cancer
carcinoma	cancer
metastatic thyroid cancer	cancer
leukemias	cancer
tlineage acute lymphoblastic leukemia	cancer
colon cancer	cancer
chemotherapeutics	cancer
oncogenes	cancer
nonhodgkins lymphoma	cancer
diffuse large b cell lymphoma	cancer
malignant	cancer
chronic myeloid leukemia	cancer
oncogene	cancer
acute myeloblastic leukemia	cancer
lymphoma	cancer
metastases	cancer
malignant brain tumor	cancer
malignancy	cancer
carcinogenesis	cancer
lung cancer	cancer
oncogenesis	cancer
apoptosis	cancer
solid tumors	cancer
ongogenesis	cancer
dlbcl	cancer
genomic stability	cancer
oxidative stress	cancer
metastatic	cancer
metastasis	cancer
dnadamaging	cancer
acute lymphoid	cancer
acute myeloid	cancer
chemotherapy	cancer
dna damaging	cancer
proapoptotic	cancer
apoptotic	cancer
melanoma	cancer
hodgkins disease	cancer
myeloid proliferative disorders	cancer
large bcell lymphoma	cancer
nonhodgkin lymphoma	cancer
chronic lymphoblastic leukemia	cancer
acute myeloid leukemia	cancer
neoplastic	cancer
hepatoma	cancer
genotoxic stress	cancer
multiple myeloma	cancer
ewing sarcoma	cancer
glioma	cancer
retinoblastoma	cancer
mitosis progression	cancer
rb	cancer
ovarian cancer	cancer
oncology	cancer
dermal cysts	cancer
aging	aging
ageassociated diseases	aging
calorie restriction	aging
agerelated macular degeneration	aging
osteoarthritis	aging
osteoporosis	aging
sarcopenia	aging
osteomalacia	aging
hypercalcemia	aging
excessive calcification	aging
bacteria	bacteria
bacterial	bacteria
staphylococcus aureus	bacteria
antibacterial	bacteria
penicillins	bacteria
gramnegative bacteria	bacteria
drug resistance	bacteria
cholera	bacteria
vibrio cholerae	bacteria
vibrionaceae	bacteria
anthrax	bacteria
bacillus anthracis	bacteria
grampositive	bacteria
grampositive	bacteria
gramnegative	bacteria
antibiotic resistance	bacteria
m tuberculosis	bacteria
tb	bacteria
treatment resistance	bacteria
streptococcus	bacteria
methicillinresistant s aureus	bacteria
mrsa	bacteria
helicobacter pylori	bacteria
escherichia coli	bacteria
p aeruginosa	bacteria
antibiotic	bacteria
antimicrobials	bacteria
e coli	bacteria
hemolytic uremic	bacteria
antibiotics	bacteria
tuberculosis	bacteria
mycobacterium tuberculosis	bacteria
clostridium difficile	bacteria
gramnegative bacterial	bacteria
mycobacterium tuberculosis	bacteria
mtuberculosis	bacteria
virus	virus
hepatitis c virus	virus
viruses	virus
hiv	virus
hiv1	virus
giardia lamblia	virus
smallpox	virus
orthopoxviruses	virus
sars	virus
epsteinbarr virus	virus
influenza virus	virus
antivirals	virus
measles virus	virus
dengue virus 2	virus
flavivirus hepatitis c virus	virus
viral infections	virus
cchf virus	virus
viral	virus
arenavirus	virus
ebola	virus
marburg virus	virus
hcv	virus
footandmouth disease virus	virus
aids	virus
antiviral	virus
ebv	virus
epsteinbarr virus	virus
hcmv	virus
cov	virus
influenza	virus
crimeancongo hemorrhagic fever	virus
viral infection	virus
virulence	virus
cytomegalovirus	virus
saccharomyces cerevisiae	fungal
yeast	fungal
fungal	fungal
antifungal	fungal
candida albicans	fungal
fungal infections	fungal
c albicans	fungal
cryptococcus neoformans	fungal
helminthes	parasite
malaria	parasite
parasite	parasite
plasmodium falciparum	parasite
trypanosoma brucei	parasite
parasitic	parasite
worms	parasite
cruzi	parasite
trypanosoma	parasite
mansoni	parasite
schistosoma	parasite
flatworms	parasite
schistosomiasis	parasite
trypanosomatidae	parasite
p falciparum	parasite
protozoan	parasite
chagas disease	parasite
sleeping sickness	parasite
antimalarial	parasite
protozoans	parasite
plasmodium	parasite
human african trypanosomiasis	parasite
protozoan trypanosoma brucei	parasite
leishmaniasis	parasite
trophozoites	parasite
leishmaniasis	parasite
helminth	parasite
cardiovascular	cardiovascular
heart	cardiovascular
myocardial infarction	cardiovascular
cardiac	cardiovascular
angiogenesis	cardiovascular
cardiovascular diseases	cardiovascular
heart disease	cardiovascular
hypoxia	cardiovascular
pompe	cardiovascular
fmdv	cardiovascular
hypertension	cardiovascular
cardiomyopathies	cardiovascular
cardiovascular disease	cardiovascular
heart failure	cardiovascular
congestive heart failure	cardiovascular
atheroscelerosis	cardiovascular
blood pressure	cardiovascular
plaque	cardiovascular
myocardial diseases	cardiovascular
atherosclerosis	cardiovascular
ischemic heart disease	cardiovascular
cardiovascular system	cardiovascular
heart attack	cardiovascular
stroke	cardiovascular
cardiac failure	cardiovascular
coronary	cardiovascular
plaques	cardiovascular
ageassociated diseases	cardiovascular
arterial thrombosis	cardiovascular
long qt syndrome	cardiovascular
cardiac arrhythmias	cardiovascular
hemolytic uremic syndrome	cardiovascular
coagulation	cardiovascular
hypercalcemia	cardiovascular
excessive calcification	cardiovascular
arrhythmias	cardiovascular
cholesterol	cardiovascular
immune system	immune system
inflammation	immune system
immune	immune system
inflammatory	immune system
autoimmune	immune system
asthma	immune system
endocrine disorders	immune system
immunity	immune system
multiple sclerosis	immune system
inflammatory diseases	immune system
hypertension	immune system
amyotrophic lateral sclerosis	immune system
antiinflammatory	immune system
als	immune system
autoimmune diseases	immune system
atheroscelerosis	immune system
atherosclerosis	immune system
immune disorders	immune system
autoimmunity	immune system
immunological	immune system
immunization	immune system
inflammatory disease	immune system
autoimmune disease	immune system
immunocompromised	immune system
immunomodulatory	immune system
immunodeficiency	immune system
neuroinflammatory	immune system
neuroinflammation	immune system
cytokine	immune system
cytokines	immune system
immune system	immune system
chemokine	immune system
inflamed	immune system
immunosuppressive	immune system
lupus	immune system
pemphigus foliaceus	immune system
pemphigus vulgaris	immune system
insulin resistance	immune system
organ transplantation	immune system
immunosuppressive	immune system
kidney transplantation	immune system
rheumatoid arthritis	immune system
autoinflammatory	immune system
diabetes	immune system
graves disease	immune system
chronic bronchitis	immune system
antiatherogenic	immune system
blaus	immune system
gastroenteritis	immune system
nervous system	nervous System
alzheimers disease	nervous System
schizophrenia	nervous System
neurodegenerative	nervous System
central nervous systems	nervous System
brain	nervous System
addiction	nervous System
parkinsons disease	nervous System
parkinson	nervous System
anxiety	nervous System
central nervous system	nervous System
neuropsychiatric disease	nervous System
antiparkinsonian	nervous System
endocrine disorders	nervous System
neurodegeneration	nervous System
energy and stresses	nervous System
mood	nervous System
neuropathic pain	nervous System
multiple sclerosis	nervous System
hypoxia	nervous System
huntingtons disease	nervous System
amyotrophic lateral sclerosis	nervous System
nervous system	nervous System
hyperprolactinemia	nervous System
tourettes syndrome	nervous System
tardive dyskinesia	nervous System
legs syndrome	nervous System
drug abuse	nervous System
neuropsychiatric disorders	nervous System
neuronal function	nervous System
central axons	nervous System
dorsal root ganglia	nervous System
sensory neurons	nervous System
alzheimers	nervous System
parkinsons	nervous System
neuromuscular	nervous System
depression	nervous System
sexual behavior	nervous System
sleep	nervous System
pain	nervous System
appetite	nervous System
nervous	nervous System
neurodegenerative diseases	nervous System
cns	nervous System
neural diseases	nervous System
degenerative muscle	nervous System
emotional regulation	nervous System
cortical neural activity	nervous System
heart neural	nervous System
neural	nervous System
neurodegenerative disease	nervous System
cocaine use	nervous System
substance abuse	nervous System
bipolar disorder	nervous System
stress	nervous System
neurological	nervous System
methamphetamine abuse	nervous System
neurological diseases	nervous System
friedreichs ataxia	nervous System
ataxia	nervous System
neuromuscular disorders	nervous System
creutzfeldtjakob disease	nervous System
prion diseases	nervous System
nerve systems	nervous System
ataxiatelangiectasia	nervous System
neuronal functions	nervous System
jakob disease	nervous System
creuzfeld	nervous System
dementia	nervous System
ear	nervous System
balance	nervous System
hearing	nervous System
neurodegenerative disorders	nervous System
hgps	nervous System
hutchinsongilford progeria syndrome	nervous System
neuron	nervous System
spinal muscular atrophy	nervous System
alzheimer	nervous System
neurological disorders	nervous System
neuronal	nervous System
sclerosis	nervous System
bloodbrain barrier	nervous System
sma	nervous System
frontotemporal lobar degeneration	nervous System
tremor	nervous System
memory problems	nervous System
neurons	nervous System
vascular	nervous System
meth	nervous System
neuronal excitation	nervous System
autism	nervous System
caucasians is friedreichs ataxia	nervous System
huntingtin	nervous System
neurogenesis	nervous System
alcoholism	nervous System
retinal degeneration	nervous System
renal	nervous System
eye diseases	nervous System
epilepsy	nervous System
fibrillogenesis	nervous System
transmitters	nervous System
neurotoxicity	toxicity
neuronal toxicity	toxicity
neurotoxin	toxicity
toxicity	toxicity
cytotoxicity	toxicity
tox21	toxicity
muscle toxicity	toxicity
epigenetic	epigenetics_genetics
down syndrome	epigenetics_genetics
diamond syndrome	epigenetics_genetics
autosomal recessive genetic syndrome	epigenetics_genetics
huntington	epigenetics_genetics
epigenetically	epigenetics_genetics
muscular dystrophy	epigenetics_genetics
hypotoniacystinuria syndrome	epigenetics_genetics
autism	epigenetics_genetics
caucasians is friedreichs ataxia	epigenetics_genetics
hemophilia	epigenetics_genetics
fabry disease	epigenetics_genetics
classic galactosemia	epigenetics_genetics
glycogenstorage disease type ii	epigenetics_genetics
gaucher	epigenetics_genetics
mccunealbright syndrome	epigenetics_genetics
pulmonary embolism	pulmonary
pulmonary	pulmonary
respiratory	pulmonary
lung	pulmonary
cystic fibrosis	pulmonary
type 2 diabetes	diabetes
diabetes	diabetes
hyperinsulinemic	diabetes
insulin	diabetes
insulin resistance	diabetes
obesity	obesity
fat	obesity
cholesterol	obesity
hyperlipidemia	obesity
weight gain	obesity
hyperinsulinemic	obesity
hypoglycemia	obesity
type 2 diabetes	obesity
diabetes	obesity
lipid	obesity
hyperlipidemias	obesity
lipid storage disorders	obesity
lysosomal storage diseases	obesity
adipogenesis	obesity
fabry disease	obesity
cholesterol biogenesis	obesity
obese	obesity
metabolic disorders	metabolic disorders
niemann pick type c	metabolic disorders
npc	metabolic disorders
shwachman	metabolic disorders
mucolipidosis	metabolic disorders
ml4	metabolic disorders
niemannpick type c	metabolic disorders
metabolic disease	metabolic disorders
metabolism	metabolic disorders
mechanotransduction	metabolic disorders
metabolic syndrome	metabolic disorders
graves disease	metabolic disorders
fabry disease	metabolic disorders
classic galactosemia	metabolic disorders
glycogenstorage disease type ii	metabolic disorders
alcoholism	metabolic disorders
hypothermia	metabolic disorders
hypoparathyroidism	metabolic disorders
hemolytic uremic syndrome	metabolic disorders
glucose metabolism	metabolic disorders
metabolic pathways	metabolic disorders
thyroid gland growth	metabolic disorders
infection	infection
pathogens	infection
infectious	infection
infections	infection
infection	infection
infectious diseases	infection
gastroenteritis	infection
